# Supplementary material for: Large-scale nanotwins in Cu films/Cu nanowires via stress engineering by a high-energy ion beam bombardment process: growth and characterization
Source: Royal Society of Chemistry journal article supplement (doi:10.1039/c4tc01549e), 2014-09-29
Supplement: c4tc01549e1.pdf [file c4tc01549e1.pdf]

## Supplementary Information

### Large-Scale Nanotwins in Copper Films/Cu Nanowires via Stress Engineering by High Energy Ion Beam Bombardment Process: Growth and Characterization

Tsung-Cheng Chan, Yu-Ze Chen, Yu-Lun Chueh\*, and Chien-Neng Liao\*

Department of Materials Science and Engineering, National Tsing Hua University, Hsinchu,  
30013, Taiwan

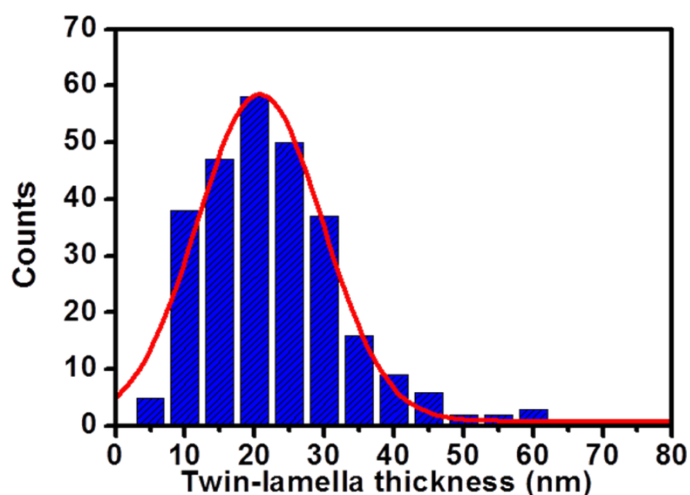

**Figure S1** Statistics of twin lamella width distributions for the patterned Cu strips.
